# Supplementary material
Source: PubMed Central journal article supplement (PMC2877140)
Supplement: NIHMS200012-supplement-Fig__S1.pdf [file NIHMS200012-supplement-Fig__S1.pdf]

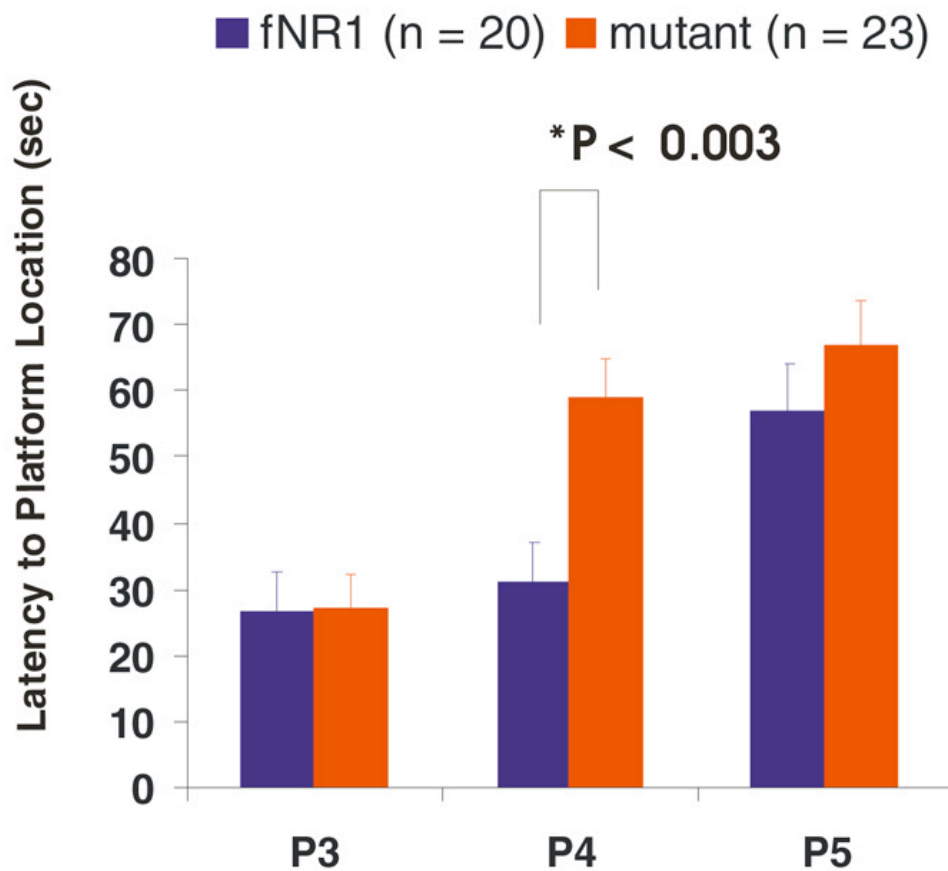

**Supplemental Figure 1.** Latencies for the first crossing of the phantom target platform during the probe trials. The latencies differed significantly between mutant and fNR1 control mice in the P4 partial-cue probe trials (t test,  $P < 0.003$ ), while no such latency difference was observed in the P3 full-cue trials or P5 no-cue trials. These results suggest that the mutants are impaired in recalling the platform locations under partial-cue conditions. On the other hand, the observation that the latency of the control mice in P4 was similar to that in P3 indicates that the partial-cue removal does not affect animal's recall capability. These results corroborate the results in Fig. 5, F through I, and strengthen the evidence of the impaired pattern completion in the CA3-NR1 KO mice.
